# Supplementary material
Source: Springer Nature journal article supplement (https://www.springermedizin.de/resource/supplementary/12889_2006_1021_MOESM6_ESM.pdf/9503152)
Supplement: MOESM6 [file 9503152]

**Week 07**

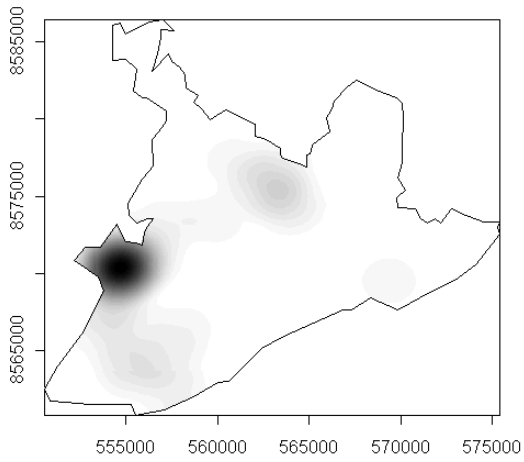

numbers of cases: 37

**Week 08**

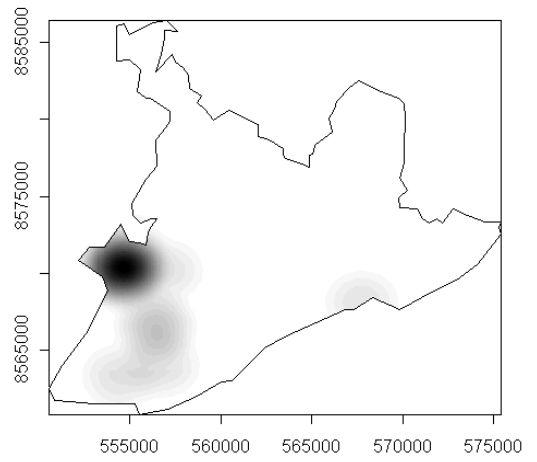

numbers of cases: 15

**Week 09**

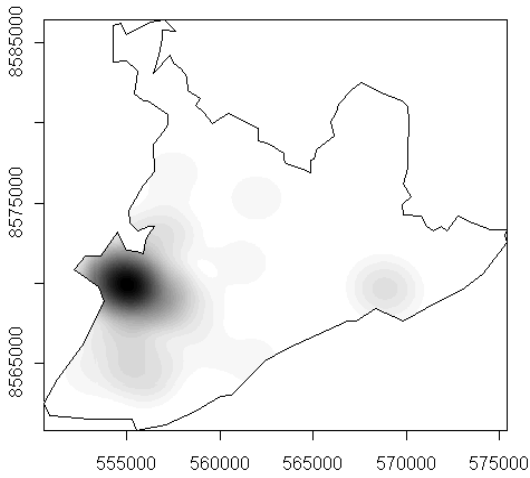

numbers of cases: 50

**Week 10**

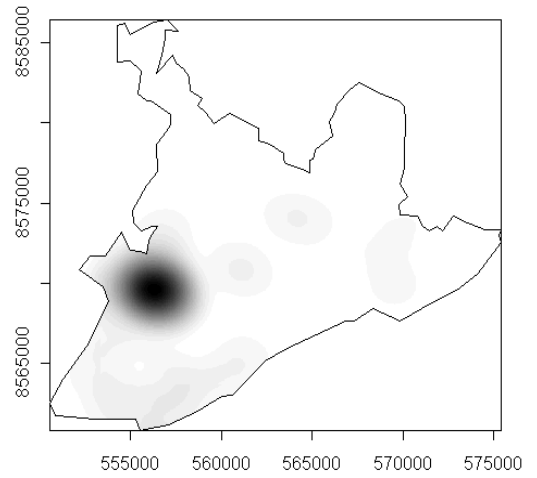

numbers of cases: 79

**Week 11**

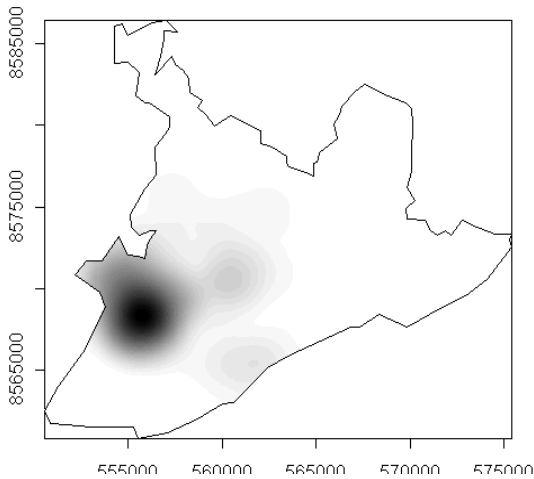

numbers of cases: 119

**Week 12**

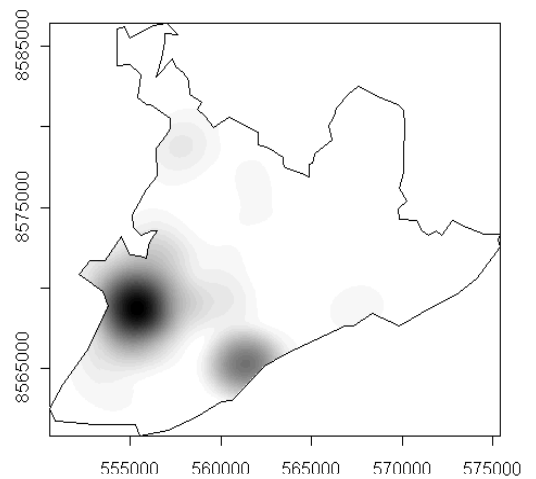

numbers of cases: 203
